# Supplementary material for: A highly durable zinc-air battery from a directly integrated FexNC@NiFe(OH)xbifunctional catalyst
Source: Royal Society of Chemistry journal article supplement (doi:10.1039/d2qi02564g), 2023-01-01
Supplement: d2qi02564g1.pdf [file d2qi02564g1.pdf]

## Supplementary materials

### **A highly durable zinc-air battery from directly integrated $\text{Fe}_x\text{NC@NiFe(OH)}_x$ bifunctional catalyst**

Hao Luo,<sup>a</sup> Yang Li,<sup>b</sup> Wenchao Wang,<sup>a</sup> Tao Zhou,<sup>a</sup> Congxiao Shang<sup>a</sup> and Zhengxiao Guo<sup>\*a</sup>

<sup>a</sup>Department of Chemistry, The University of Hong Kong, Hong Kong SAR, China

<sup>b</sup>Department of Mechanical and Aerospace Engineering, The Hong Kong University of Science and Technology, Clear Water Bay, Hong Kong SAR, China

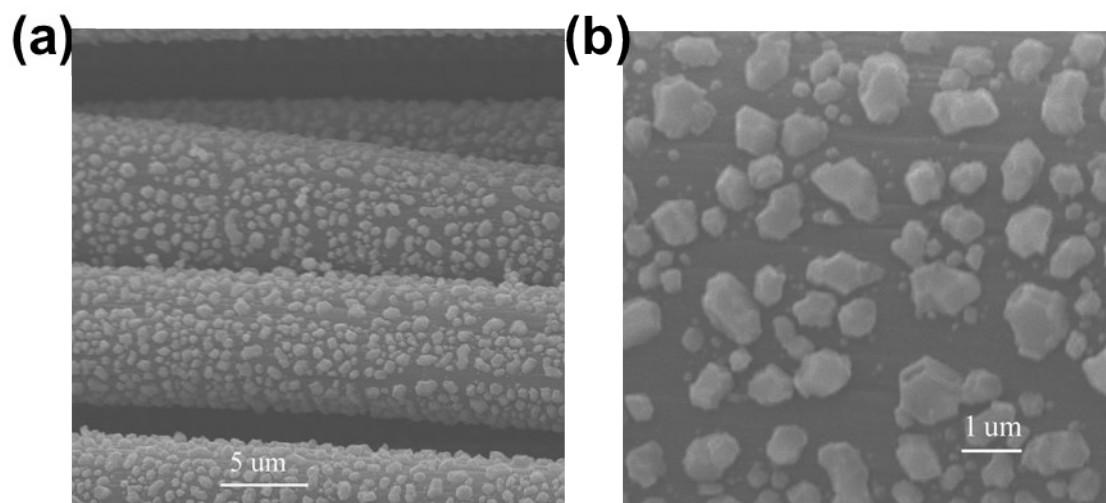

**Fig. S1** (a, b) SEM images of  $\text{FeFe}(\text{CN})_6$  particles on carbon cloth.

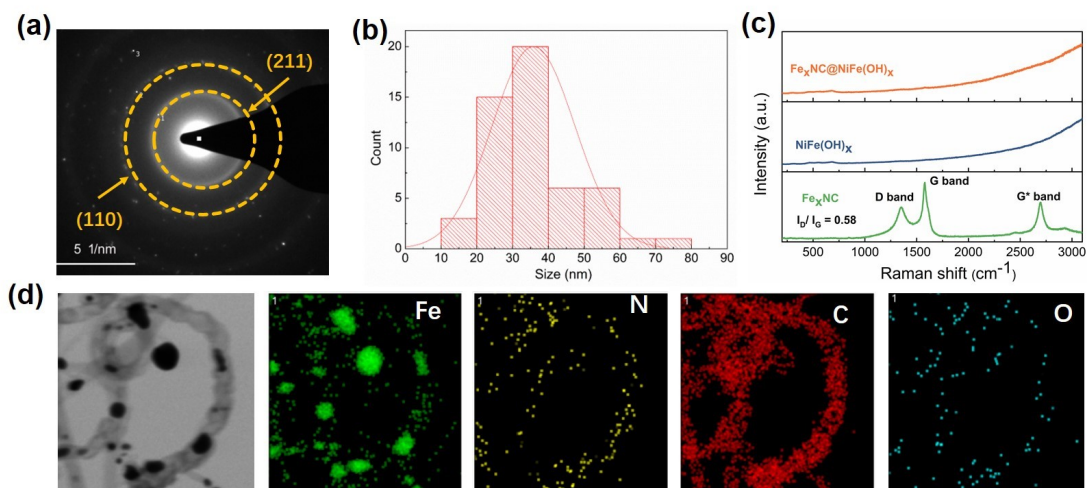

**Fig. S2** (a) Fourier transform (FFT) image of Fe<sub>x</sub>NC. (b) Size distribution of nanoparticles measured from Fig. 1d. (c) Raman spectra of as-prepared electrodes (d) Energy-dispersive X-ray spectroscopy (EDS) elemental mapping images of Fe<sub>x</sub>NC.

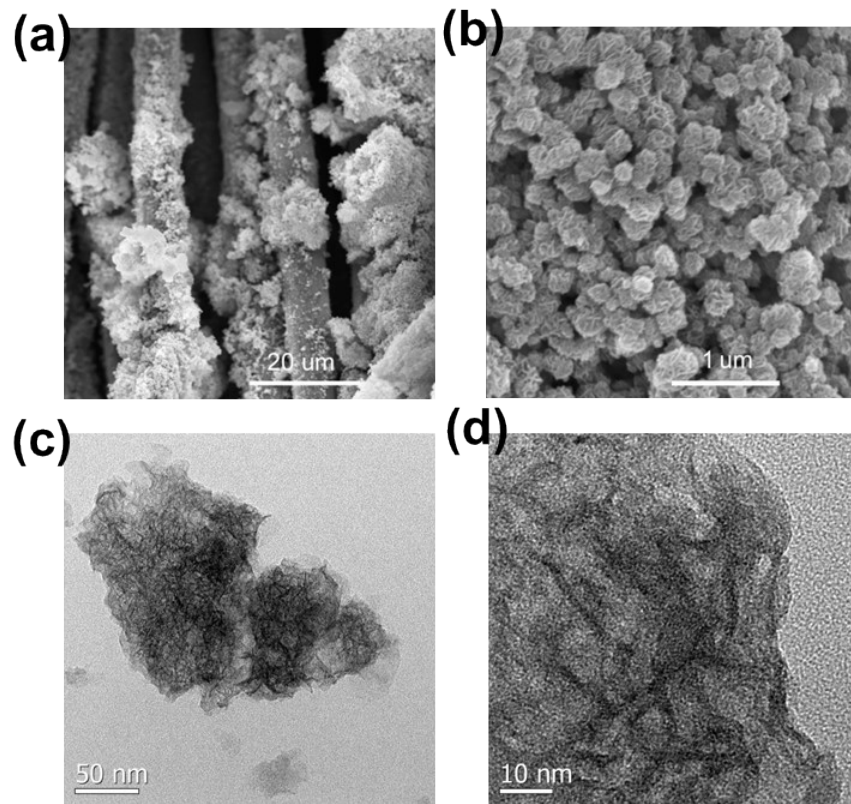

**Fig. S3** (a, b) SEM images of NiFe(OH)<sub>x</sub> on carbon cloth and (c, d) TEM images of NiFe(OH)<sub>x</sub>.

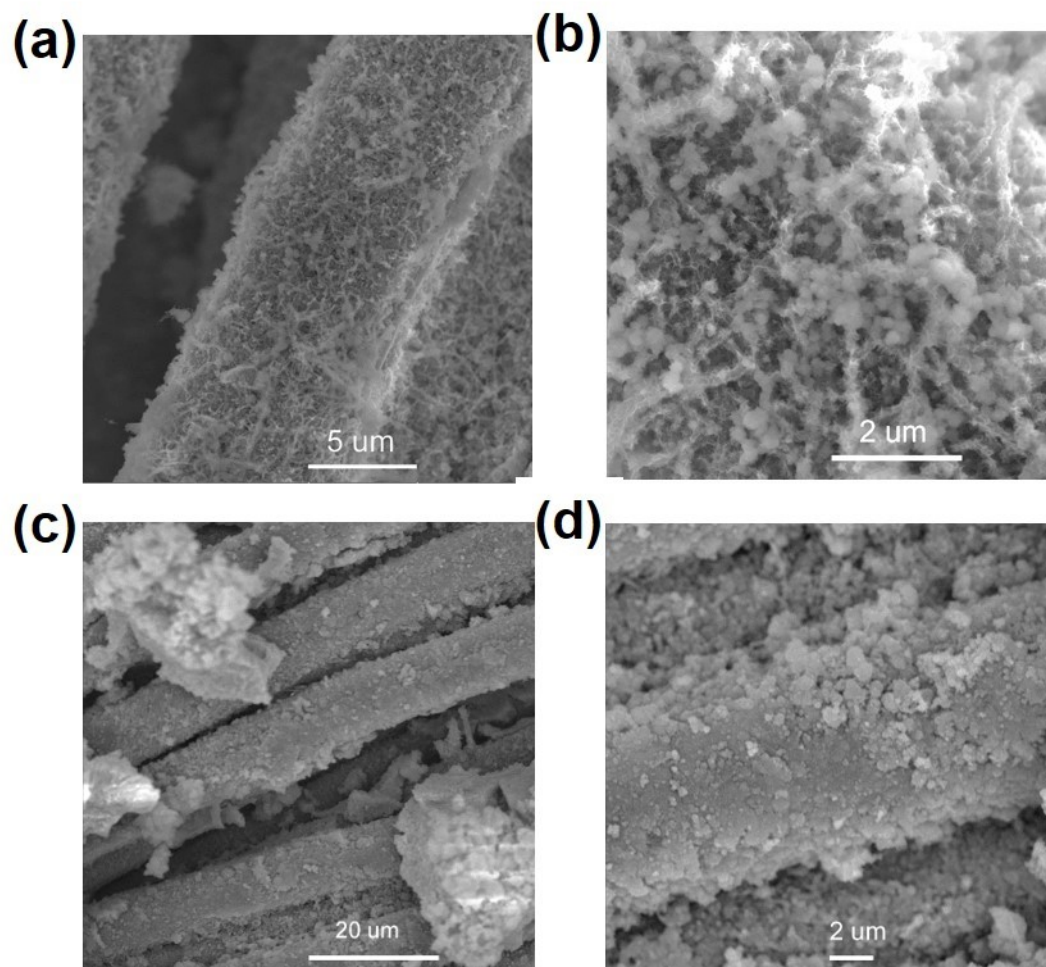

**Fig. S4** SEM images of (a, b)  $\text{Fe}_x\text{NC}@NiFe(OH)_x-0.3$  and (c, d)  $\text{Fe}_x\text{NC}@NiFe(OH)_x-10$ .

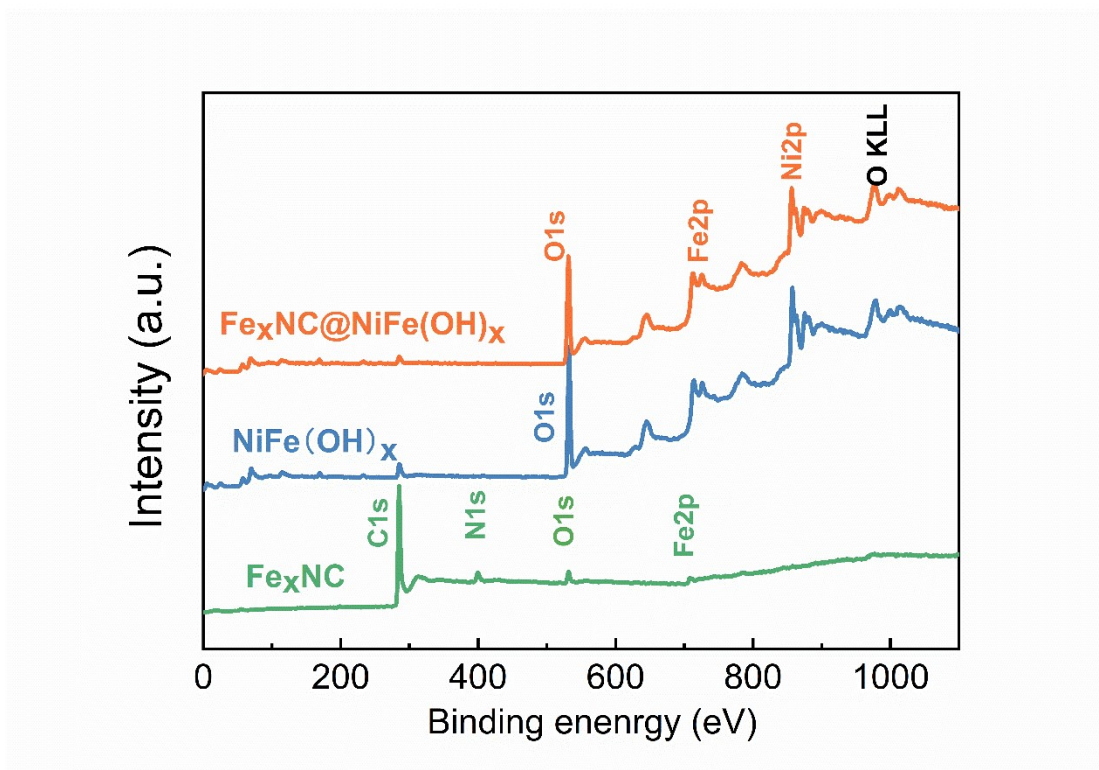

**Fig. S5** Full XPS survey spectra of  $\text{Fe}_x\text{NC}@Ni\text{Fe}(\text{OH})_x$ ,  $Ni\text{Fe}(\text{OH})_x$  and  $\text{Fe}_x\text{NC}$ .

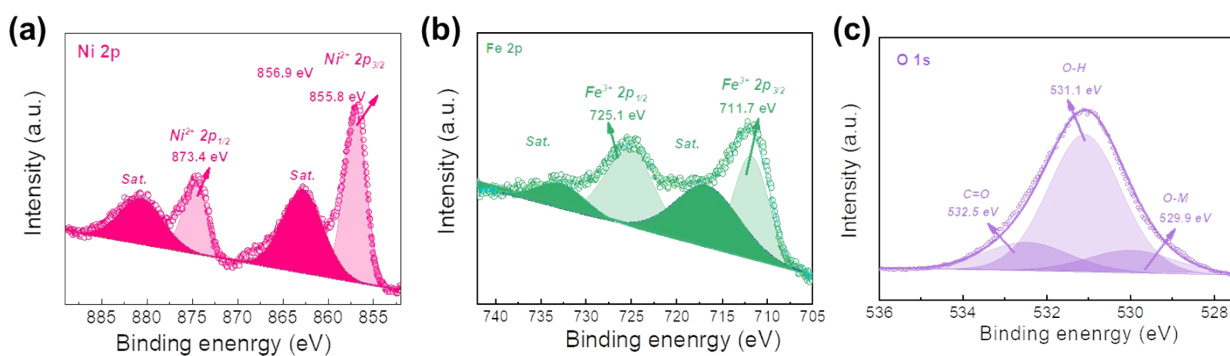

**Fig. S6** High resolution XPS spectra of  $Ni\text{Fe}(\text{OH})_x$ : (a) Ni 2p, (b) Fe 2p and (c) O 1s.

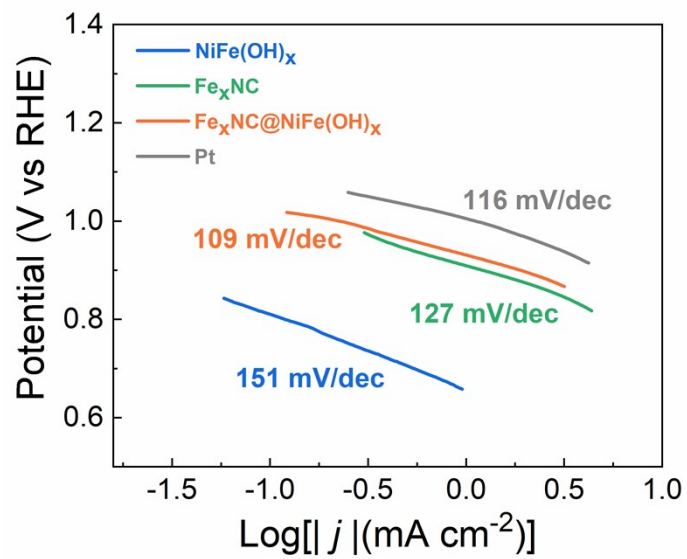

**Fig. S7** ORR Tafel slopes of Fe<sub>x</sub>NC@NiFe(OH)<sub>x</sub>, NiFe(OH)<sub>x</sub>, Fe<sub>x</sub>NC and Pt.

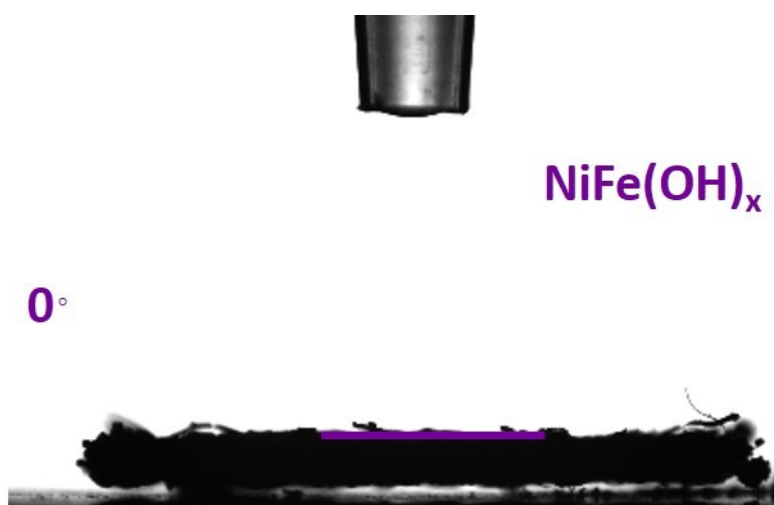

**Fig. S8** Contact angle evaluation on NiFe(OH)<sub>x</sub>.

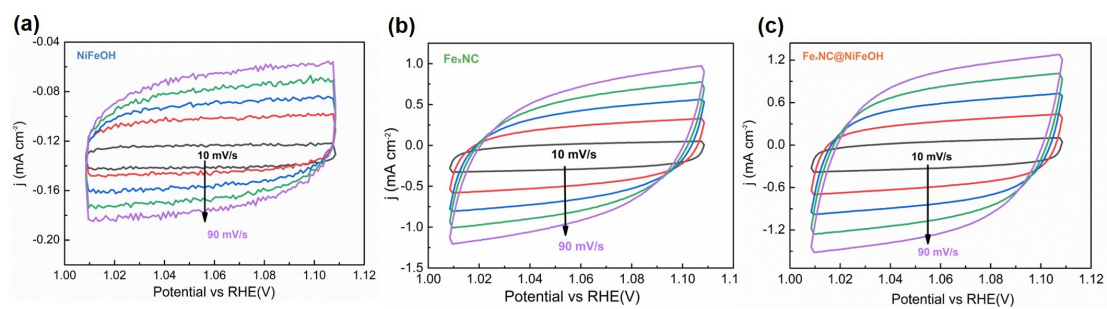

**Fig. S9** The CV curves recorded between 1.00 V and 1.12 V at different scan rates on (a)  $\text{NiFe(OH)}_x$ , (b)  $\text{Fe}_x\text{NC}$ , and (c)  $\text{Fe}_x\text{NC@NiFe(OH)}_x$ .



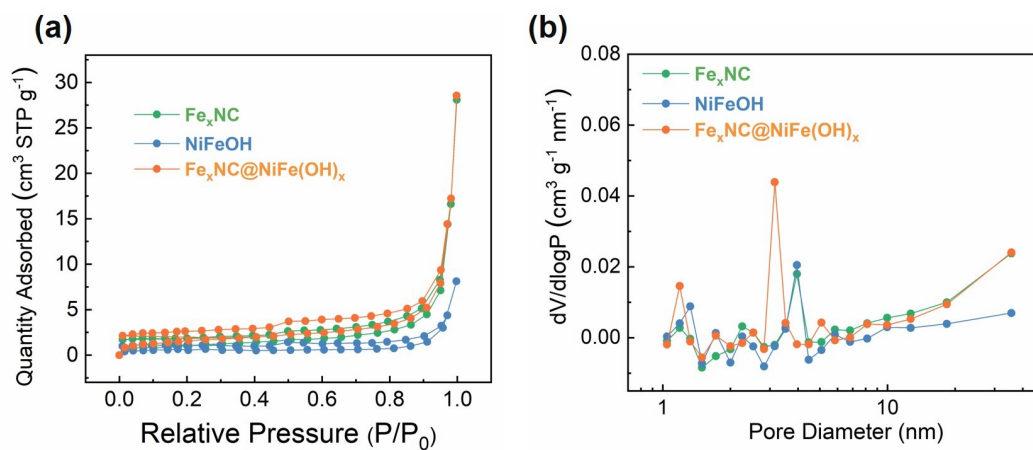

**Fig. S10** (a)  $N_2$  adsorption/desorption isotherms and (b) BJH pore size distribution of  $\text{Fe}_x\text{NC}$ ,  $\text{NiFe(OH)}_x$ , and  $\text{Fe}_x\text{NC@NiFe(OH)}_x$ , respectively.

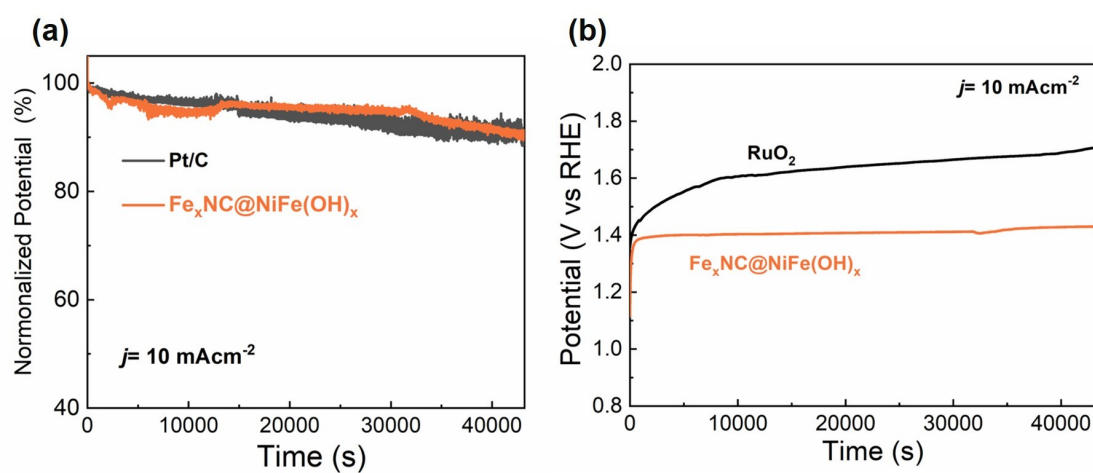

**Fig. S11** (a) Chronopotentiometric test of Pt/C and  $\text{Fe}_x\text{NC@NiFe(OH)}_x$  at  $10 \text{ mA cm}^{-2}$ . (b) Chronopotentiometry test of  $\text{RuO}_2$  and  $\text{Fe}_x\text{NC@NiFe(OH)}_x$  at  $10 \text{ mA cm}^{-2}$ .

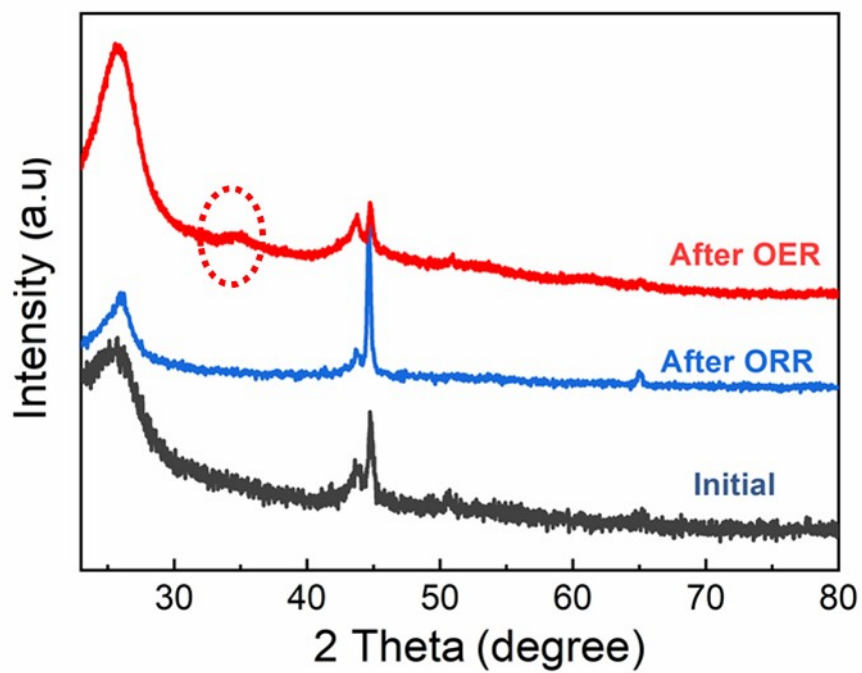

**Fig. S12** XRD patterns of  $\text{Fe}_x\text{NC@NiFe(OH)}_x$  electrode after 12 h OER and ORR.

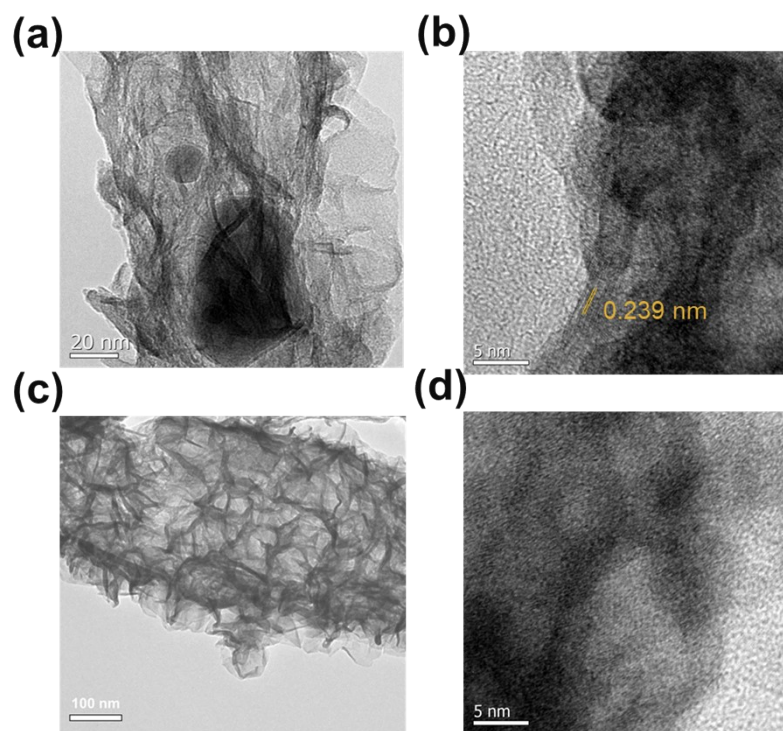

**Fig. S13** TEM image of  $\text{Fe}_x\text{NC}@Ni\text{Fe}(\text{OH})_x$  after 12 h (a, b) OER and (c, d) ORR.

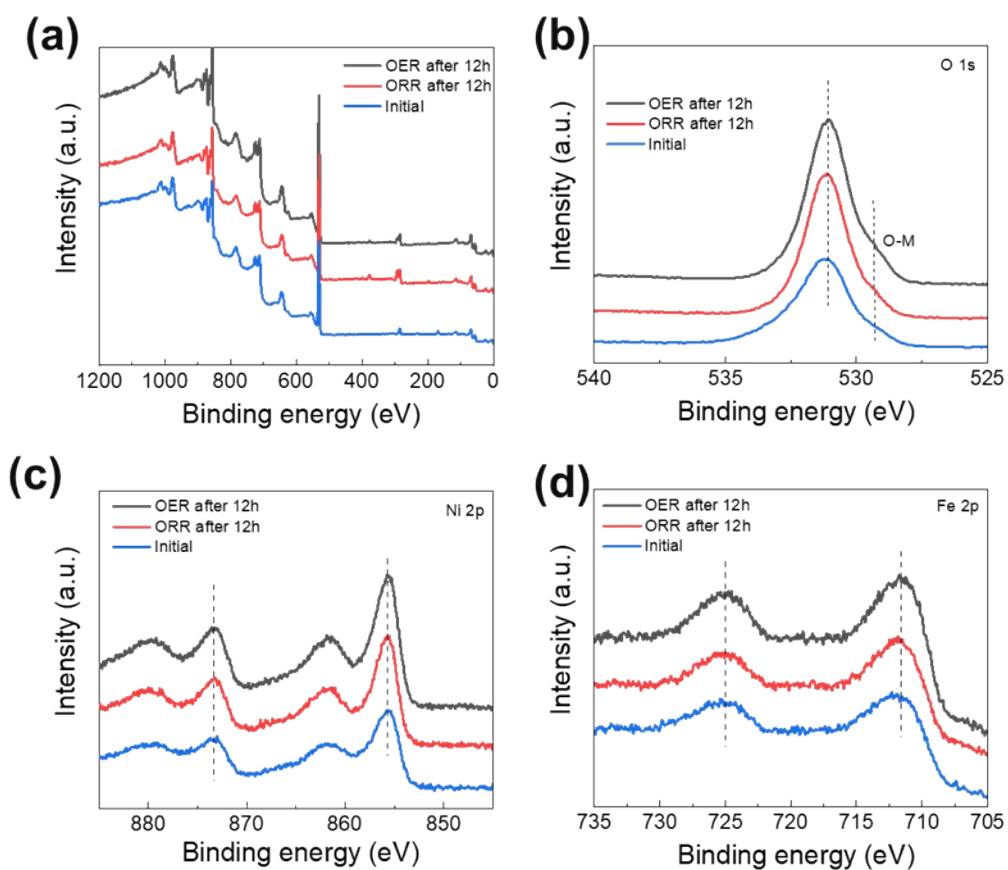

**Fig. S14** XPS plots of post-OER electrode, post-ORR electrode and the initial one: (a) full survey spectra, (b) O 1s, (c) Ni 2p and (d) Fe 2p.

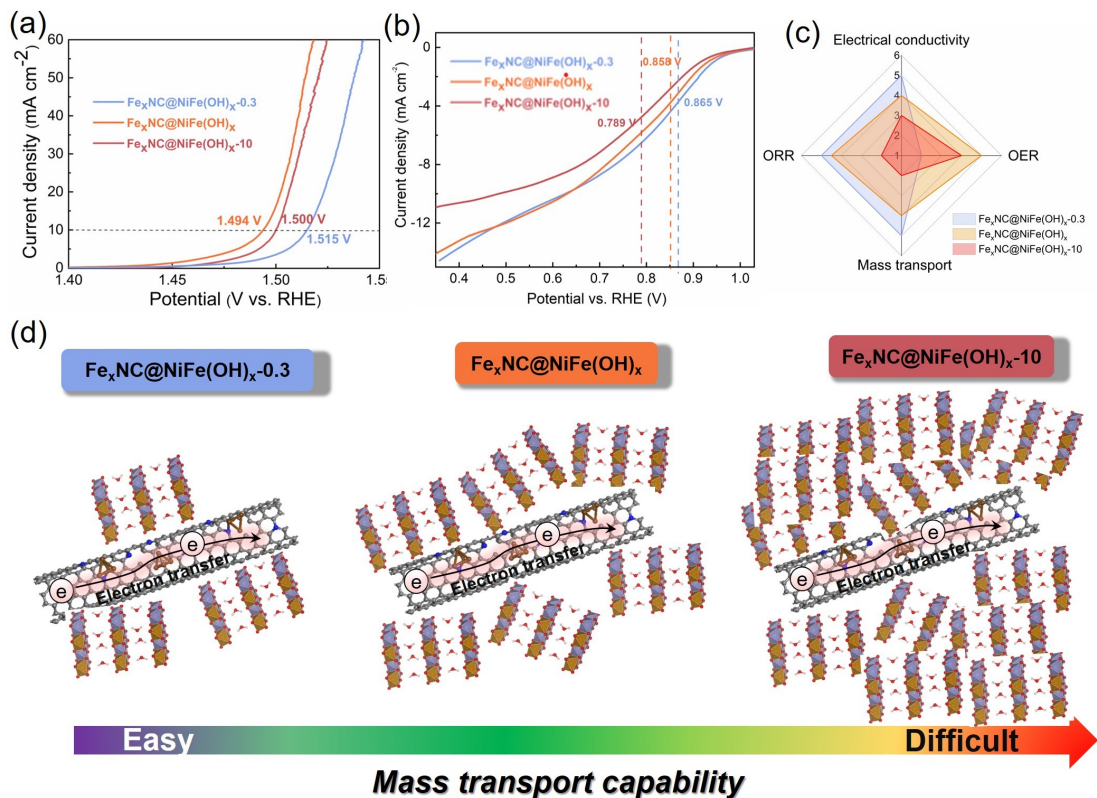

**Fig. S15** Electrocatalytic performance of electrodes with different deposition times for (a) OER, (b) ORR and (c) comparison of their physicochemical characteristics. (d) Schematic illustration of mass transport capability on electrodes with different amounts of NiFe(OH)<sub>x</sub>.

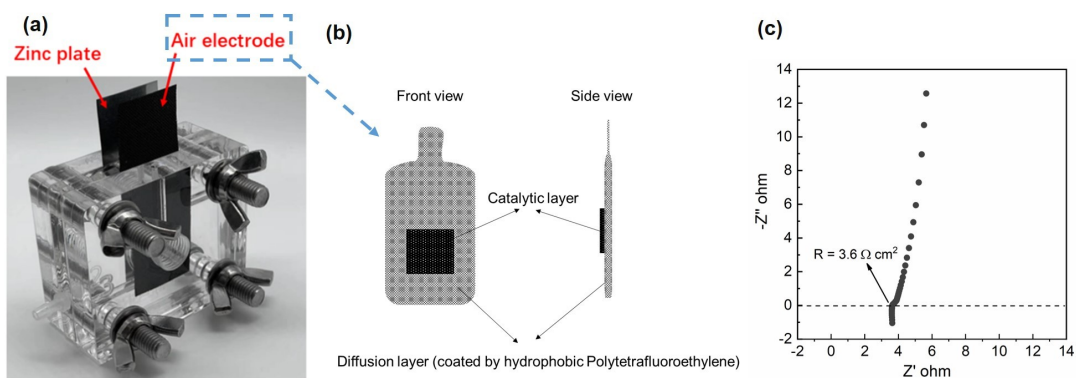

**Fig. S16** (a) The photo of a homemade zinc-air battery. (b) The configuration of the air cathode. (c) Corresponding EIS of ZABs: the intersection of X-axis represents the electronic resistance in the cell.

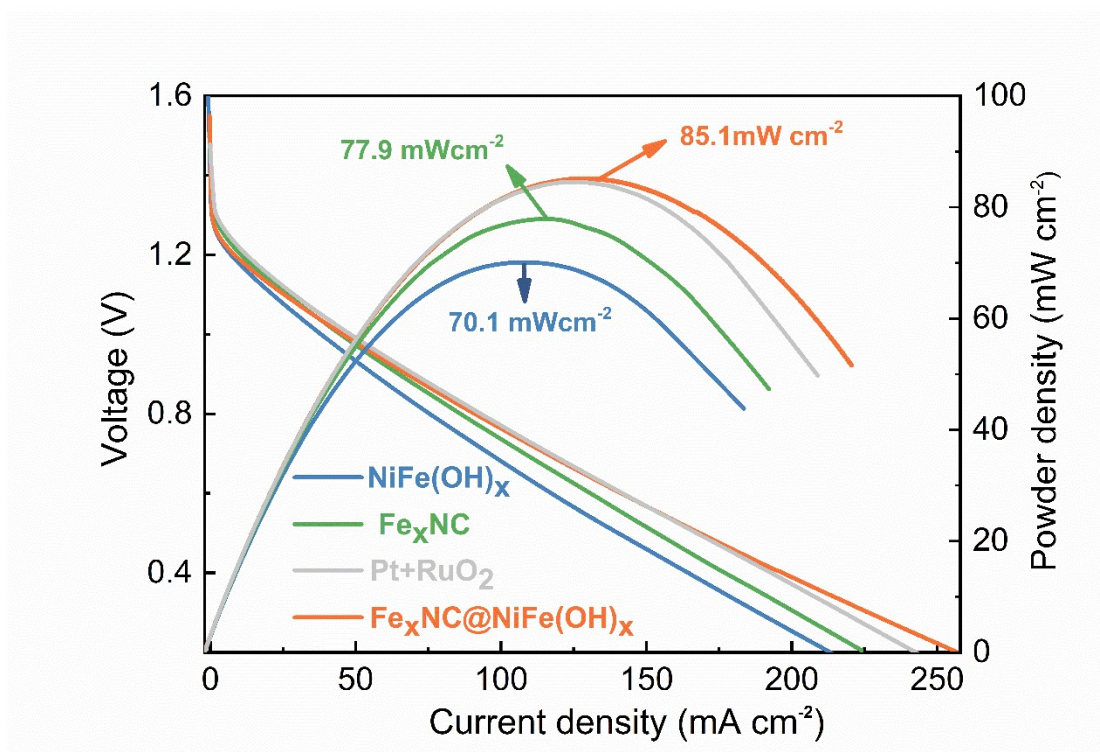

**Fig. S17** The power density of ZABs with different electrodes.



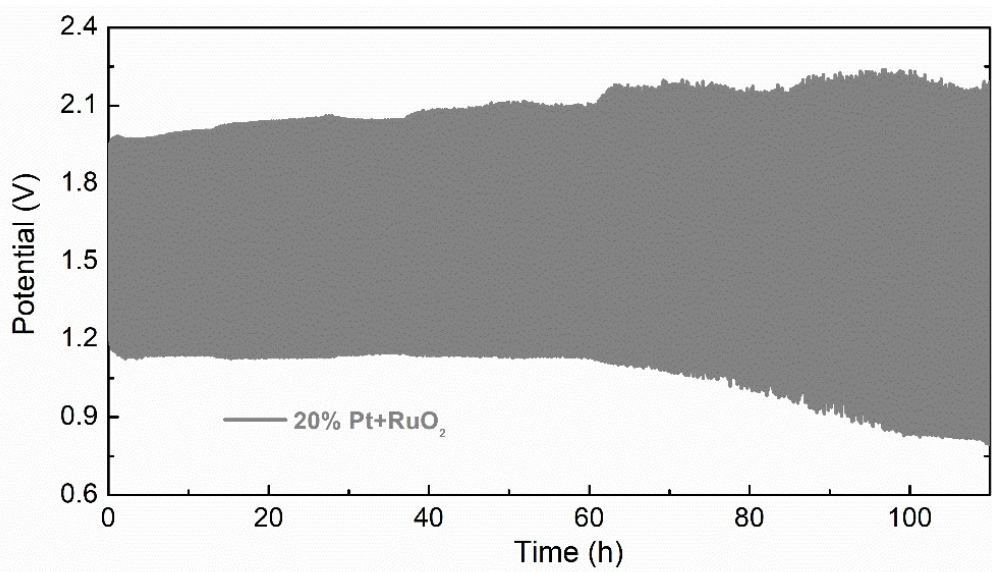

**Fig. S18** The discharge/charge curves of Zn-air battery with electrode of 20 % Pt and RuO<sub>2</sub> at 10.0 mA cm<sup>-2</sup>.

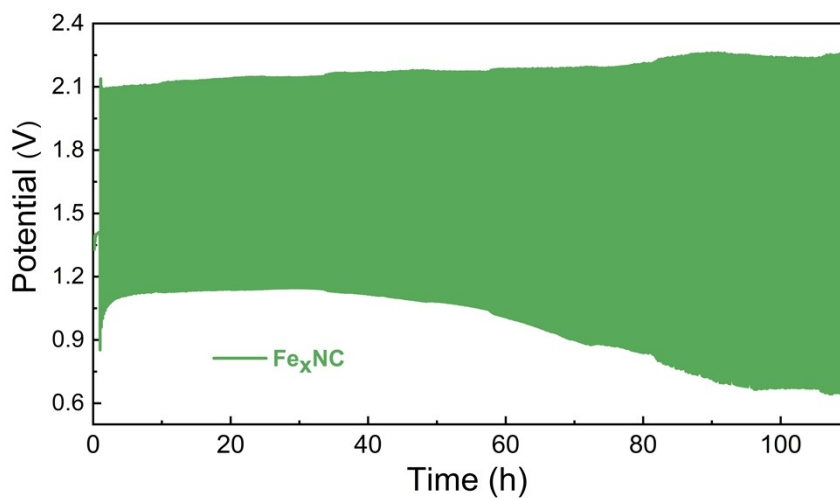

**Fig. S19** The discharge/charge curves of Zn-air battery with electrode of Fe<sub>x</sub>NC at 10.0 mA cm<sup>-2</sup>.

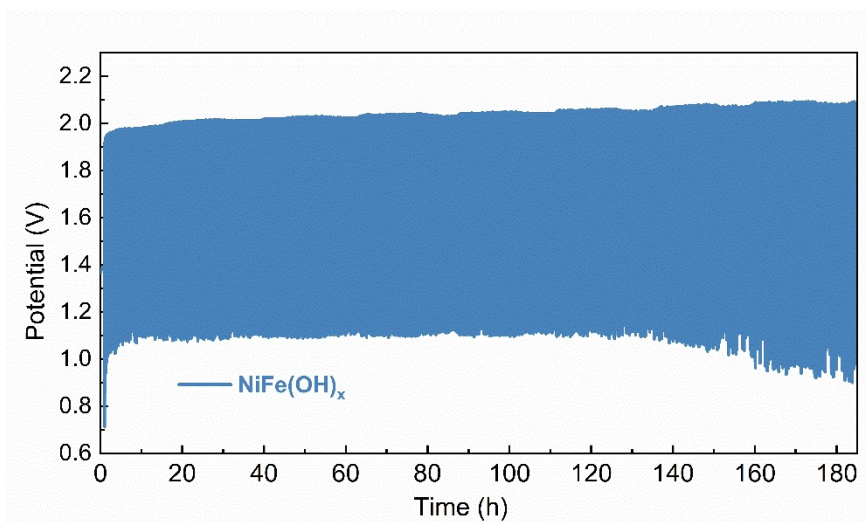

**Fig. S20** The discharge/charge curves of Zn-air battery with electrode of  $\text{NiFe(OH)}_x$  at  $10.0 \text{ mA cm}^{-2}$ .

**Table S1** EDS results of the prepared electrodes (wt. %).

|    | Wt. % |                     |                                   |
|----|-------|---------------------|-----------------------------------|
|    | FeNC  | $\text{NiFe(OH)}_x$ | $\text{Fe}_x\text{NC@NiFe(OH)}_x$ |
| Fe | 8.19  | 2.5                 | 19.62                             |
| Ni | -     | 3.42                | 16.79                             |
| C  | 90.12 | 15.31               | 46.02                             |
| O  | -     | 78.78               | 17.58                             |
| N  | 1.56  | -                   | -                                 |



**Table S2** Proportion of graphitic N, pyrrolic N, Fe-N<sub>x</sub> and pyridinic N in the Fe<sub>x</sub>NT according to the XPS analysis.

| Types    | Pyridine-N | Fe-N  | Pyrolytic-N | Graphical-N | Oxidized -N |
|----------|------------|-------|-------------|-------------|-------------|
| Contents | 30.9%      | 20.3% | 11.9%       | 22.1%       | 14.8%       |

**Table S3** XPS results of the prepared electrodes (at. %).

|    | Atomic % |                       |                                          |
|----|----------|-----------------------|------------------------------------------|
|    | FeNC     | NiFe(OH) <sub>x</sub> | Fe <sub>x</sub> NC@NiFe(OH) <sub>x</sub> |
| Fe | 0.89     | 12.19                 | 14.09                                    |
| Ni | -        | 16.18                 | 16.98                                    |
| C  | 92.17    | 17.17                 | 11.18                                    |
| O  | -        | 53.25                 | 57.13                                    |
| N  | 0.09     | -                     | -                                        |

**Table S4** Comparison of E<sub>j=10</sub> and E<sub>1/2</sub> on different electrodes.

| Catalysts                                | E <sub>j=10</sub> (V) | E <sub>1/2</sub> (V) |
|------------------------------------------|-----------------------|----------------------|
| Fe <sub>x</sub> NC@NiFe(OH) <sub>x</sub> | 1.494                 | 0.858                |
| Fe <sub>x</sub> NC                       | 1.607                 | 0.825                |
| NiFe(OH) <sub>x</sub>                    | 1.511                 | 0.685                |
| RuO <sub>2</sub> /Pt/C                   | 1.562                 | 0.899                |

**Table S5** BET surface area and pore volume of the different electrocatalysts.

| Catalysts                                | BET surface area (m <sup>2</sup> g <sup>-1</sup> ) | Pore volume (cm <sup>3</sup> g <sup>-1</sup> ) |
|------------------------------------------|----------------------------------------------------|------------------------------------------------|
| Fe <sub>x</sub> NC                       | 4.14                                               | 0.039                                          |
| NiFe(OH) <sub>x</sub>                    | 2.54                                               | 0.011                                          |
| Fe <sub>x</sub> NC@NiFe(OH) <sub>x</sub> | 5.88                                               | 0.041                                          |

**Table S6** Comparison of electrochemical performance on previously reported electrodes ZABs

| Catalysts                                       | $\eta$ @10 mA (V) | E 1/2 (V) | $\Delta E$ (V) | Current density (mA cm <sup>-2</sup> ) | Cycling hours (hrs) | Reference |
|-------------------------------------------------|-------------------|-----------|----------------|----------------------------------------|---------------------|-----------|
| Fe <sub>x</sub> NC@NiFe(OH) <sub>x</sub>        | 0.264             | 0.858     | 0.636          | 10                                     | 350                 | This work |
| Co <sub>3</sub> O <sub>4</sub> /WS <sub>2</sub> | 0.330             | 0.81      | 0.750          | 5                                      | 16                  | 1         |
| NiFe-LDH/Co,N-CNF                               | 0.312             | 0.790     | 0.752          | 25                                     | 80                  | 2         |
| Co <sub>3</sub> O <sub>4</sub> @POF             | 0.33              | 0.82      | 0.74           | 10                                     | 60                  | 3         |
| Fe/N/C@BMZIF                                    | 0.41              | 0.85      | 0.79           | 10                                     | 17                  | 4         |
| Fe,Ni-N-C/N-CNT                                 | 0.315             | 0.879     | 0.666          | 10                                     | 200                 | 5         |
| NiCo <sub>2</sub> O <sub>4</sub> @NiCoFe-OH     | 0.235             | 0.77      | 0.695          | 10                                     | 250                 | 6         |

**Table S7** Comparison of ZAB performances with  $\text{Fe}_x\text{NC@NiFe(OH)}_x$ , Pt/C+ $\text{RuO}_2$ , and other reported cathodes operating at  $10 \text{ mA cm}^{-2}$ .

| Electrodes                                 | Voltage gap(V) | Cycle number | Reference |
|--------------------------------------------|----------------|--------------|-----------|
| $\text{Fe}_x\text{NC@NiFeOH}$              | 0.81           | 2000         | This work |
| Pt/C+ $\text{RuO}_2$                       | 0.87           | 530          | This work |
| Zn-Co-S-NN/CFP                             | 0.85           | 200          | 7         |
| Cu-Foam@CuCoNC-500                         | 0.8            | 1080         | 8         |
| CMO/NCNF                                   | 0.93           | 350          | 9         |
| $\text{NiS}_x\text{-FeO}_y\text{/SCFP}$    | 1.00           | 55           | 10        |
| Fe-N/C-1/30                                | 1.00           | 50           | 11        |
| $\text{NiCo}_2\text{O}_4\text{@NiCoFe-OH}$ | 0.83           | 500          | 6         |
| Co@NCNTA/CC                                | 0.80           | 1020         | 12        |
| am-Fe-Bi/NF                                | 0.60           | 85           | 13        |
| $\text{Co}_3\text{O}_4\text{@NiFe LDH}$    | 0.80           | 1200         | 14        |
| N-Co/CNF                                   | 0.74           | 100          | 15        |
| $\text{Co}_4\text{N/CNW/CC}$               | 0.84           | 408          | 16        |
| NC- $\text{Co}_3\text{O}_4\text{/CC-600}$  | 0.87           | 106          | 17        |
| $\text{CoO}_x\text{@NC}$                   | 0.80           | 110          | 18        |
| NCCo/CoN <sub>x</sub>                      | 0.80           | 1200         | 19        |
| CMO-U@CC                                   | 0.70           | 150          | 20        |
| NiFe/NCNF/CC                               | 0.79           | 700          | 21        |

#### References:

1. Y. Ling, M. Li, K. Qu, Z. Yang, Electronically interacted  $\text{Co}_3\text{O}_4\text{/WS}_2$  as superior oxygen electrode for rechargeable zinc-air batteries, *Chem. Commun.*, **2020**, 56, 15193-15196.
2. Q. Wang, L. Shang, R. Shi, X. Zhang, Y. Zhao, G. I. N. Waterhouse, L. Z. Wu, C.H. Tung, T. Zhang, NiFe layered double hydroxide nanoparticles on Co, N-Codoped carbon nanoframes as efficient bifunctional catalysts for rechargeable Zinc-air batteries, *Adv. Energy Mater.*, **2017**, 7, 1700467.
3. J. N. Liu, B. Q. Li, C. X. Zhao, J. Yu, Q. Zhang, A composite bifunctional oxygen electrocatalyst for high-performance rechargeable Zinc-air batteries, *ChemSusChem*, **2020**, 13, 1529.

4. M. Wang, T. Qian, J. Zhou, C. Yan, An efficient bifunctional electrocatalyst for a zinc-air battery derived from Fe/N/C and bimetallic metal-organic framework composites, *ACS Appl. Mater. Interfaces*, **2017**, *9*, 5213-5221.
- 5 J. Fang, X. Zhang, X. Wang, D. Liu, Y. Xue, Z. Xu, Y. Zhang, C. Song, W. Zhu, Z. Zhuang, A metal and nitrogen doped carbon composite with both oxygen reduction and evolution active sites for rechargeable zinc-air batteries, *J. Mater. Chem. A*, **2020**, *8*, 15752.
6. S. Li, X. Yang, S. Yang, Q. Gao, S. Zhang, X. Yu, Y. Fang, S. Yang, X. Cai, An amorphous trimetallic (Ni-Co-Fe) hydroxide-sheathed 3D bifunctional electrode for superior oxygen evolution and high-performance cable-type flexible zinc-air batteries, *J. Mater. Chem. A*, **2020**, *8*, 5601-5611.
7. X. Wu, X. Han, X. Ma, W. Zhang, Y. Deng, C. Zhong, W. Hu, Morphology-controllable synthesis of Zn-Co-mixed sulfide nanostructures on carbon fiber paper toward efficient rechargeable zinc-air batteries and water electrolysis, *ACS Appl. Mater. Interfaces*, **2017**, *9*, 12574-12583.
8. H. Sun, Q. Li, Y. Lian, C. Zhang, P. Qi, Q. Mu, H. Jin, B. Zhang, M. Chen, Z. Deng, Y. Peng, Highly efficient water splitting driven by zinc-air batteries with a single catalyst incorporating rich active species, *Appl. Catal., B*, **2020**, *263*, 118139.
9. X. Chen, Z. Yan, M. Yu, H. Sun, F. Liu, Q. Zhang, F. Cheng, J. Chen, Spinel oxide nanoparticles embedded in nitrogen-doped carbon nanofibers as a robust and self-standing bifunctional oxygen cathode for Zn-air batteries, *J. Mater. Chem. A*, **2019**, *7*, 24868-24876.
10. Y. Cheng, D. Li, L. Shi, Z. Xiang, Efficient unitary oxygen electrode for air-based flow batteries, *Nano Energy* **2018**, *47*, 361-24876.
11. W. Wei, X. Shi, P. Gao, S. Wang, W. Hu, X. Zhao, Y. Ni, X. Xu, Y. Xu, W. Yan, H. Ji, M. Cao, Well-elaborated mechanochemically synthesized Fe-TPP@ZIF precursors (Fe-TPP = tetraphenylporphine iron) to atomically dispersed iron-nitrogen species for oxygen reduction reaction and Zn-air batteries, *Nano Energy* **2018**, *52*, 29-37.

12. L. Liu, Y. Wang, F. Yan, C. Zhu, B. Geng, Y. Chen, S. I. Chou, Cobalt-encapsulated nitrogen-doped carbon nanotube arrays for flexible zinc-air batteries, *Small Methods* **2020**, *4*, 1900571.
13. W. Zhao, T. Xu, T. Li, Y. Wang, H. Liu, J. Feng, S. Ding, Z. Li, M. Wu, Amorphous Iron (III)-borate nanolattices as multifunctional electrodes for self-driven overall water splitting and rechargeable Zinc-air battery, *Small* **2018**, *14*, 1802829.
14. X. Guo, X. Hu, D. Wu, C. Jing, W. Liu, Z. Ren, Q. Zhao, X. Jiang, C. Xu, Y. Zhang, N. Hu, Tuning the bifunctional oxygen electrocatalytic properties of core-shell  $\text{Co}_3\text{O}_4@\text{NiFe}$  LDH Catalysts for Zn-air batteries: effects of interfacial cation valences, *ACS Appl. Mater. Interfaces*. **2019**, *11*, 21506-21514.
15. P. Rao, P. Cui, Z. Wei, M. Wang, J. Ma, Y. Wang, X. Zhao, Integrated N-Co/carbon nanofiber cathode for highly efficient zinc-air batteries, *ACS Appl. Mater. Interfaces* **2019**, *11*, 29708-29717.
16. F. Meng, H. Zhong, D. Bao, J. Yan, X. Zhang, In situ coupling of strung  $\text{Co}_4\text{N}$  and intertwined N-C fibers toward free-standing bifunctional cathode for robust, efficient, and flexible Zn-air batteries, *J. Am. Chem. Soc.*, **2016**, *138*, 10226-10231.
17. Q. Liu, L. Wang, X. Liu, P. Yu, C. Tian, H. Fu, N-doped carbon-coated  $\text{Co}_3\text{O}_4$  nanosheet array/carbon cloth for stable rechargeable Zn-air batteries, *Sci. China Mater.*, **2018**, *62*, 624.
18. Y. Hao, Y. Xu, N. Han, J. Liu, X. Sun, Boosting the bifunctional electrocatalytic oxygen activities of  $\text{CoO}_x$  nanoarrays with a porous N-doped carbon coating and their application in Zn-air batteries, *J. Mater. Chem. A*, **2017**, *5*, 17804-17810.
19. C. Guan, A. Sumboja, W. Zang, Y. Qian, H. Zhang, X. Liu, Z. Liu, D. Zhao, S. J. Pennycook, J. Wang, Decorating Co/ $\text{CoN}_x$  nanoparticles in nitrogen-doped carbon nanoarrays for flexible and rechargeable zinc-air batteries, *Energy Storage Mater.*, **2019**, *16*, 243-250.
20. J. Qian, X. Guo, T. Wang, P. Liu, H. Zhang, D. Gao, Bifunctional porous Co-doped NiO nanoflowers electrocatalysts for rechargeable zinc-air batteries, *Appl. Catal. B*, **2019**, *250*, 71-77.

21. C. Lai, J. Fang, X. Liu, M. Gong, T. Zhao, T. Shen, K. Wang, K. Jiang, D. Wang, In situ coupling of NiFe nanoparticles with N-doped carbon nanofibers for Zn-air batteries driven water splitting, *Appl. Catal. B*, **2021**, 285,119856
